# Consensus, Dissensus, and Economic Ideas: Economic Crisis and the Rise and Fall of Keynesianism

HENRY FARRELL

George Washington University

AND

JOHN QUIGGIN

University of Queensland

During the recent economic crisis, Keynesian ideas about fiscal stimulus briefly seemed to form the basis of a new expert consensus about how to deal with demand shocks. However, this apparent consensus soon collapsed into a continuing dissensus, with important consequences for policy. Neither conventional bargaining accounts nor existing theories of the role of ideas in policy outcomes easily explain the arc of international responses to the Great Recession. In this article, we propose that sociological arguments about professions, in conjunction with those about spaces of political contention as ecologies, provide a better understanding of the puzzle of Keynesianism's rise and decline. The internal dynamics of prestige and status within the profession of economics intersected with policy arguments between states so as to make macroeconomic policy a "hinge" issue, over which coalitions in both ecologies contended. This explains how Keynesian economists and political actors worked together in the first phase of the crisis to advocate for and implement fiscal stimulus. It also explains why aggrieved policy actors, who did not favor stimulus, could help disrupt the apparent consensus in the second phase of the crisis by promoting the views of dissident economists.

## Introduction

The historical trajectory of Keynesianism plays a crucial role in debates about expert knowledge and political economy (Hall 1989; Weir 1989; Best 2004) and domestic and international order (Blyth 2002; Ruggie 1982; Babb 2013). A core Keynesian claim—that fiscal stimulus allows states to escape problems of persistent low demand—enjoyed a limited revival during the recent economic crisis.<sup>1</sup> When the urgency of the crisis became clear, major industrialized states used fiscal stimulus to try to limit the damage to their economy during 2009–2010. Yet, prior to 2007, there was an apparently strong consensus among economists that Keynesianism *did not work*. Why then did a Keynesian consensus about the proximate causes of the

economic crisis emerge so quickly? And why did it collapse so quickly after 2010, giving way to continuing dissensus between Keynesians and their pro-austerity antagonists (Blyth 2013a, Chapter 3)?

We argue that neither traditional approaches to political economy nor currently dominant idea-based approaches explain this pattern. Instead, we turn to an emerging literature on *sociological arguments about professions*, arguing that macroeconomic policy created a "hinge" issue affecting struggles both within the economic profession and also among political elites. These two fields of contention came to intersect, so that first the contours of disagreement and agreement among economists came to shape contention among policymakers, and then the contours of disagreement and agreement among policymakers came to shape contention among economists. Understanding this intersection allows us to better explain the dynamics of the rise and fall of an apparent Keynesian consensus.

Specifically, we build on both Marion Fourcade's research on the international profession of economics, and Andrew Abbott's theory of how different ecologies of actors can have consequences for each other when actors in each ecology identify "hinge" issues that have consequences for both, creating the opportunity for cross-ecology alliances. Fourcade's account, together with that of other economic sociologists, provides a concise understanding of the internal ecology of economics itself—how it works across different national systems, and how its internal hierarchies operate. This allows us to reconstruct struggles between different groups *within* economics, and how these struggles are channeled by the structures of the profession.

Abbott's arguments allow us to understand how struggles between different groups of actors within the

---

Henry Farrell is an associate professor of political science and international relations at George Washington University. He blogs at Crooked Timber (<http://www.crookedtimber.org>) and the Monkey Cage ([washingtonpost.com/blogs/monkey-cage/](http://washingtonpost.com/blogs/monkey-cage/)).

John Quiggin is an Australian Laureate Fellow in economics at the University of Queensland. He blogs at Crooked Timber (<http://www.crookedtimber.org>).

*Authors' note:* We are grateful to several anonymous reviewers, as well as Cornel Ban, Sheri Berman, Nancy Bermeo, Dan Hirschman, Matthias Matthijs, Nolan McCarty, Kate McNamara, Thomas Oatley, Abraham Newman, Herman Schwartz, Marcus Walker, the participants in a Princeton University seminar, and the readers of Crooked Timber for comments on earlier versions of this article. Henry Farrell wishes to thank the Woodrow Wilson Center for International Scholars for support during the initial stages of research.

<sup>1</sup>Although this claim became broadly identified with Keynesianism during recent debates, historically existing Keynesianism is far more complicated, both as theory and as empirical practice. To preserve a simple exposition, we adopt the more recent shorthand identification of Keynesianism and stimulus strategy in this article.

economics profession can intersect with struggles among economic policymakers via hinge issues. Professional economists care about policy influence because it is imbricated with the prestige structures of the profession, hence shaping the self-identity of economists. Policy actors care about the advice of professional economists both because it helps them deal with specific policy problems, and because expert approval casts luster on their own efforts, providing them with an important resource in battles with other policymakers.

This helps us understand how economic consensus and dissensus played an important role during the Great Recession. When economists appear to share a consensus on a given topic, then policymakers whose policies are in line with the consensus will enjoy an advantage over those whose policy positions contradict it. The former can use the consensus to increase the costs of dissidence for the latter. However, because the internal prestige structures of economics favor economists who have perceived policy influence, disadvantaged policymakers have reason and opportunity to destabilize professional consensus by elevating dissident economists in policy discussion.

This explains why economists and policy actors had reason to work together in the first place. The advent of the Great Recession damaged the prestige of a dominant clique of economists that had assumed that the “Great Moderation” of smooth economic policymaking and growth would continue indefinitely, providing opportunities for previously marginalized macro-economists who advocated a Keynesian perspective to press the case for Keynesian ideas and policies. A new apparent consensus emerged among economists, in which Keynesian approaches predominated, giving greater license to policymakers in the United States and elsewhere who advocated fiscal stimulus.

It also explains why the politics of economic policy shifted so dramatically in the later stages of the crisis. When policymakers dislike an expert consensus, they have good reason and tools to try to destabilize it. The combination of Greece’s debt crisis and the perceived need to shift toward a more “normal” set of policy prescriptions helped policymakers in Germany and the European Central Bank to boost the prestige of economists who were hostile to Keynesian prescriptions. This made it easier for policymakers to deviate from demand stimulus policies without suffering censure from an apparently unified economics profession.

#### *Professions and Ecologies in the Study of International Political Economy*

Scholars of political economy have long studied the relationship between ideas and politics (Ban and Blyth 2013; Barnett and Finnemore 2004; Berman 1998; Blyth 2002; McNamara 1998). This debate initially took place under the broad rubric of historical institutionalism (Blyth 2003), although recent work in historical institutionalism has moved away from sociology—and a focus on ideas—toward rational-choice approaches.<sup>2</sup>

More recently, international relations scholars have begun to study professions—self-conscious and self-organized groups of actors, with access to specialized abstract knowledge, who use this access to maintain and increase their social status—in the international economy (Ban 2016; Chwieroth 2009; Seabrooke and Tsingou 2014). In doing

so, they build on sociologists’ work on international (Faulconbridge and Muzio 2008; Fourcade 2006; Harrington 2012) and national professions (Abbott 1988). Professions can work as “transnational communities” (Djelic and Quack 2010), as networks (Crane 1972; Carpenter 2007; Avant 2016), and as “global governors” (Avant, Finnemore, and Sell 2010) to shape international politics (Seabrooke and Tsingou 2014). They co-exist with other collective actors in a complex system of ecologies, competing and collaborating over who has jurisdiction over particular tasks and activities.<sup>3</sup>

Furthermore, different subgroups may struggle with each other within a particular profession, so that the profession itself constitutes an ecology. Subgroups within one ecology may seek to reproduce themselves in another, creating “avatars” (Abbott 2005; Seabrooke 2014). For example, Elizabeth Berman (2016) identifies how economists reshaped antitrust policy by creating an avatar within the legal academy. On other occasions, subgroups in different ecologies seek to work together on “hinge” issues that reward each in its respective ecology, allowing them to work toward mutually compatible goals (Abbott 2005). In nineteenth-century New York, for example, disputes in the medical profession between homeopaths and “allopaths” became linked to the broader ecology of politics. Medical licensing became a hinge issue because it allowed the homeopathic faction in the medical profession to push against licensing requirements that would advantage their competitors, while allowing the democratic radical faction in politics to reinforce its partisan advantage by opposing licensing and trumpeting its faith in the reasoning ability of the ordinary citizen (Abbott 2005).

#### *Existing Approaches to Expert Consensus*

Traditional international relations debates turn on the influence of a group with authoritative specialist knowledge over a politically important set of actors.<sup>4</sup> Typically, they raise two questions. First, do ideas have political consequences? While scholars who stress the importance of ideas argue that they do, skeptics suggest that policymakers are driven not by changes in economic ideas, but by predefined interests.<sup>5</sup> Second, if economic ideas do have consequences, how do they work? Here, scholars argue over whether economic ideas influence policymakers through legitimacy (Finnemore and Sikkink 1998; Haas 1992), coalition building (Blyth 2002), organizational dynamics (Ban 2015a; Chwieroth 2009), or coercion (Nelson 2014). The existing literature largely assumes that the key relationship is one way—from experts with ideas to policymakers with executive capability.

This helps frame the role of expert consensus during the recent economic crisis. Here, we define expert consensus as an “apparent consensus” (Urfalino 2007, 53) within the relevant community of experts regarding how best to conceptualize, and hence solve, a significant given problem. Specifically, we examine the Keynesian conceptualization of economic crises as a self-perpetuating problem of weak aggregate demand, which is best solved through fiscal measures such as increased government spending. Apparent consensus around such a conceptualization

<sup>3</sup>As Abbott himself (2005, 71) notes, his understanding of an ecology is related to Pierre Bourdieu’s concept of the “field,” which in turn has had considerable influence in sociology, and more recently in international relations.

<sup>4</sup>See Hirschman and Berman (2014) for an excellent recent survey of the debate.

<sup>5</sup>See Drezner (2007), but also for a quite different perspective, Drezner and McNamara (2013); for an overview, see Woods (1995).

<sup>2</sup>See Blyth, Helgadóttir, and Kring (2016) and Farrell and Finnemore (2016) for arguments for increased engagement between historical institutionalism and sociological institutionalism over the role of ideas.

within the relevant community of experts will increase its policy influence. Dissensus will decrease it (Cross 2013, 148), allowing policymakers to pick and choose expert accounts of the problem and solution that justify their prior preferences. We emphasize that consensus need only be apparent to work; even if many experts quietly disagree with a consensus, their silent heresy will be invisible to policymakers and hence ineffectual. Nor does expert consensus completely constrain policymakers (Berman and Pagnucco 2010, 363–64; see also Berman and Milanes-Reyes (2013) on how policymakers can transform purported expertise into symbolic politics); it simply raises the material and social costs of dissent.

Conceptualizing consensus and dissensus in this way allows us to ask whether the degree of expert agreement or disagreement over Keynesianism has visible consequences for policymakers.<sup>6</sup> Here, we are less interested in *measuring* the consequences of expert agreement or disagreement than in simply assessing whether they proved reasonably consequential. First, if expert debate was irrelevant to policymakers, then *all* ideational accounts (including our own) are implausible. The most plausible counter-explanation would be one in which state-level policymakers with asymmetric power—based on market size—and exogenously fixed preferences bargained over their preferred policy outcomes (Drezner 2007; Elkins, Guzman, and Simmons 2006; Krasner 1991). Different outcomes would result from visible shifts in bargaining power rather than any change in the collective beliefs of experts. The sudden resurgence of Keynesianism in 2008–2010 would result from changing relative market size of pro- and anti-Keynesian countries, as would the collapse of the Keynesian consensus in late 2010. Figure 1 illustrates the underlying assumptions of standard bargaining accounts.

More specifically, what *drives* expert consensus and dissensus if they have consequences? The existing literature offers three major explanations.

The epistemic communities approach would lead one to focus on how disinterested inquiry within a scientific community can lead to the creation of a legitimate consensus (Cross 2013; Haas 1992). Under this approach, shared normative and principled beliefs, common causal understandings, notions of validity, and goals centered on improving human welfare (Haas 1992, 3) will guide expert communities to shared judgments that persuade policymakers precisely because they are based on a “well-reasoned consensus among those in the best position to know” (Cross 2013, 147). In the economic crisis, it would predict that an epistemic community of experts would formulate and revise their ideas about Keynesian stimulus by testing them against the available evidence, and that where they were able to create a consensus, it would prove compelling to policymakers across different states.

The second explanation argues that expert economists arrive at a consensus through hierarchical socialization, which selects on individuals with certain kinds of beliefs, and strongly discourages dissent from dominant views, hence creating great ideological stability (Nelson 2014, 304). This would suggest that the previously existing consensus, in which fiscal stimulus policies were more or less ruled out of theoretical and empirical discussions, would continue to prevail and shape the options open to policymakers, through a combination of persuasion and coercion.

<sup>6</sup>See Hirschman and Berman (2014) for a definitive overview of the social science literature on how and whether economists’ ideas shape the choices of policymakers.

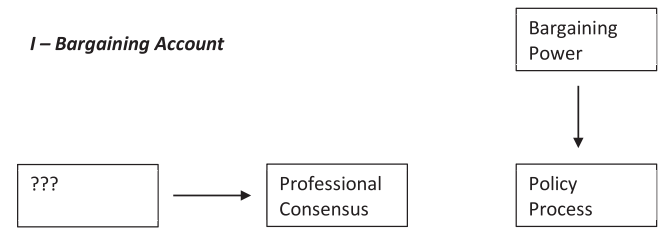

**Figure 1** Causal relations underlying the bargaining account (professional consensus has no impact on policy process).

**II – Standard Ideational Accounts**

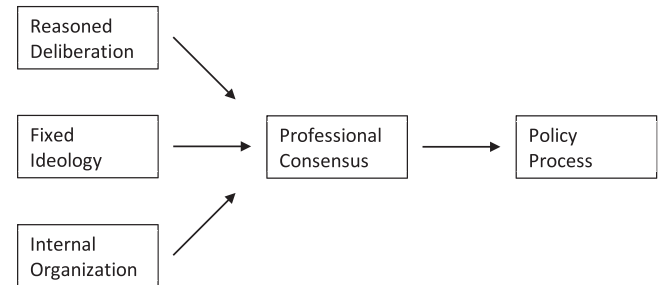

**Figure 2** Causal relations underlying the main ideational account.

Finally, the organizational approach examines how internal processes within specific organizations—professionalization, administrative recruitment, adaptation, learning, and entrepreneurship—affect consensus building among professionals (Ban 2015a; Chwieroth 2009). Here, professional economists may reach new consensus after vigorous internal debates, which are shaped by organizational structures, recruitment patterns, and population dynamics as older economists retire and are replaced by newer ones. This account would focus on how the forces of turnover and organizational change in the relevant expert organizations reshaped ideas about Keynesian stimulus in ways that would then prove persuasive to outside policymakers. Figure 2 illustrates the causal stories underlying these accounts.

*A “Hinging” Approach to Expert Consensus*

The ideational accounts summarized above focus on *internal* dynamics among experts, allowing for learning, but providing relatively little scope for feedback from the policymakers they influence. Our alternative, like Chwieroth (2009), treats economics as a profession, but emphasizes how macroeconomic policy debates may create a “hinge” between the profession of economics and the ecology of economic policymakers. This provides opportunities for subgroups to collaborate across ecologies. Our account seeks to identify (a) the characteristics of the internal ecology of the discipline of economics, (b) the relevant aspects of the ecology of macroeconomic policymaking during the economic crisis, and (c) the relationship between the two.

Following in particular Fourcade (2006, 2009) and her colleagues (Fourcade, Ollion, and Algan 2015; see also Bockman and Eyal 2002; Hirschman and Berman 2014, Van Gunten 2015), the *internal ecology of economics* has four



important structural characteristics that shape contention between factions and subgroups of economists. First, economics is unusually cross-national in scope as a profession (Fourcade 2006, 162), despite different “national styles” associated with different states (Fourcade 2009). Second, it is dominated by US (and, to a much lesser extent, UK) economists and institutions (Fourcade 2006, 172; Cardoso, Guimaraes, and Zimmermann 2010, 479; Evans and Finnemore 2001, 11). Third, economics is highly hierarchical, as compared to other disciplines and professions (Fourcade et al. 2015, 96; Han 2003), so that a small number of elite economists and institutions dominate collaboration networks and have outsized influence over publication and hiring. Finally, the economics profession has significant overlap between academia and economic policymaking, most notably the Federal Reserve (Campbell and Pedersen 2014, 58) and international institutions, especially the IMF (Nelson 2014, 309), the World Bank, and the OECD.

These structures shape the dynamics of contention and cooperation between subgroups within the economics profession. Interactions between different subgroups of economists are mediated through the relationships between a small group of “star” or “core” economists (Goyal, van der Leij, and Moraga-González 2006, 408). These economists are overwhelmingly located at US departments or in elite roles at US or international institutions. However, these star economists’ self-understanding and status in part depends on their international policy influence (Fourcade 2006, 186). This creates the basis for a two-way process of exchange within the discipline, where economists in non-US jurisdictions look to star economists in the United States for legitimation (Bockman and Eyal 2002, 328; Mandelkern and Shalev 2010, 475–76), while “core” economists gain legitimacy when their ideas have consequence outside the United States.<sup>7</sup>

During the period in question, these broader structures affected contention between two important subgroups in macroeconomics (Önder and Terviö 2014). On the one hand, Keynesians argued for active government management of an economy that could fall into traps of under- or over-production (Blinder and Snowdon 2001), providing a rationale for counter-cyclic fiscal policy. On the other hand, monetarists and scholars of New Classical Macroeconomics (so-called ‘freshwater economics’) argued against the purported benefits of macroeconomic stabilization policy (Blinder and Snowdon 2001). Over the 1980s and 1990s, freshwater economists succeeded in shaping an apparent consensus within the academic profession that Keynesian policies had dubious microfoundations and policy benefits (Feldstein 1981; Colander 2007; Mankiw 2006). Keynesians sought to respond through “New Keynesianism,” which incorporated some modeling techniques from freshwater economics. However, their revised approach effectively sidelined fiscal tools in favor of monetary policy (Krugman 2009; Blanchard 2008; Quiggin 2010; Blinder 2004), even though research began to emerge in the early 2000s arguing that fiscal policy could be effective (Ban 2015a, 172).

The *general ecology of economic policymaking*, like most political ecologies (Abbott 2005, 251), is relatively amorphous. However, during the 2008–2012 economic crisis, a specific ecology of international macroeconomic policymaking emerged, with structures that shaped (a) the contours of decision-making, and (b) the distribution of knowledge. There was no international institution that was

formally charged with macroeconomic policy coordination. This meant that the major debates were interstate interactions in bilateral and loose “club” fora such as the G20. As bargaining theorists might have predicted (Drezner 2007), these debates were dominated by states with big enough markets to have clout. The United States interpreted the crisis through the lens of the 1930s history of depressed demand, and sought to coordinate advanced industrial economies around a common approach based on maintenance of free trade relations and economic stimulus. Germany, in contrast, interpreted the crisis as a consequence of the failure to create and implement strong rules in the financial sector, and sought to resist US demands (Blyth 2013a, Chapter 5; Drezner 2014, 165). Potential challengers to the Western order such as China preferred tacitly to cooperate with the US position from the sidelines (Jiang 2011, 352). International organizations, including the IMF and the OECD, translated expert economic knowledge into non-binding policy arguments and prescriptions.

Within the United States, the executive branch set the agenda on international macroeconomic coordination (Drezner 2014; Lizza 2009; Scheiber 2012; Suskind 2011). Congress did not play an explicit international role, but did act as a potential restraint on international deals, which frequently involved coordinated domestic actions across countries. Interconnections between the administration and the economics academy played a key role in shaping policy (Campbell and Pedersen 2014), especially through the Council of Economic Advisers, a body composed entirely of highly respected academic economists appointed by the administration (Schultze 1996; Wallich 1968), which was expected both to provide frank internal advice and to advocate for the administration’s policies in public debate (Wallich 1968, 349).

Within Germany, too, the key actor was the federal government. Germany’s economics “knowledge regime” involves a variety of federal and private actors (Campbell and Pedersen 2014), but the crucial intermediary body is the Council of Economic Experts (Sachverständigenrat), a highly influential body of well-respected economists, which provides economists with formal input into German policy debates (Campbell and Pedersen 2014; Wallich 1968). Unlike the Council of Economic Advisers, the German Council is not formally a part of government, is non-partisan, and has considerable independent political clout (Wallich 1968, 349–50). It is made up of five prominent academic economists, who are typically directly involved in international debates over economic theory.

Germany also was embedded in the European Union, an organization whose recent structures—most notably the Eurozone’s Growth and Stability Pact and European Central Bank—were intended to restrain states from loose fiscal policy (Heipertz and Verdun 2010). The dearth of formal institutional arrangements, combined with the importance and sensitivity of the questions, meant that interstate politics played a dominant role, although the European Commission sought opportunistically to expand its competences (Jones 2007). Germany, as the largest and most influential state, was especially important in these intra-EU discussions, helping influence, for example, the European Central Bank (Blyth 2013a, 64).

This mapping suggests a reciprocal rather than one-way relationship between the profession of economics and economic policymakers. Specifically, it suggests that economic policy during the crisis was a “hinge” issue for subgroups in both the economics profession and

<sup>7</sup>However, see Ban (2016) and Helgadóttir (2016) for discussion of how national systems of economic thought can exert their own counter-influence.

## III – Hinging Account

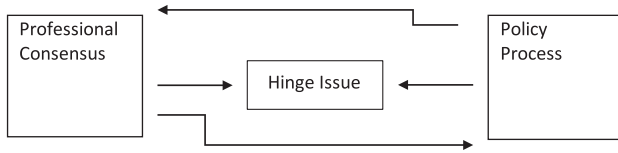

Figure 3 Causal relations underlying the hinging account.

policymakers, giving different subgroups reason to work toward compatible goals. This potentially *explains the shifting politics of consensus and dissensus*. We illustrate this account's assumptions about the relationship between ideas and policy in Figure 3. Bargaining accounts assume that changes in professional consensus have no consequences for changes in policy. Standard ideational accounts assume a one-way causal relationship from professional consensus to policy outcomes, although they disagree on what the exact mechanism is. Our account, in contrast, assumes a reciprocal relationship between professional consensus and policy influence, as long as actors in both the professional and policy communities each focus on the same hinge issue.

Apparent consensus among economists advantages political decision-makers whose preferred policies are in line with the consensus, while disadvantaging those whose preferred policies are at odds with it. The former can use the consensus to increase the costs of dissidence for the latter. However, because the internal prestige structures of economics favors economists who have perceived policy influence, disadvantaged policymakers have reason and opportunity to destabilize professional consensus, by elevating dissident economists in policy discussion. Exactly because expert consensus has policy consequences, policy actors have strong incentive to reshape and destabilize expert consensus that they do not like.

This potentially explains why Keynesian economists and economic policymakers who interpreted the Great Recession as in part a crisis of demand worked together. Keynesian economists' ideas had been marginalized. This gave them a strong motivation to legitimize these ideas as the obvious basis for interpreting and resolving the crisis. Their goal was compatible with the goal of those economic policymakers (especially in the United States) who urgently wanted to shore up a global economic order based on free trade and liberalism that suddenly appeared very fragile. These policymakers were less interested in academic debates than policy consequences, but they agreed the problem was a crisis of demand and urgently wanted to coordinate states around a coordinated stimulus.

However, other policymakers also had potential reason to coordinate with economists. Policymakers in Germany disliked Keynesianism and saw the crisis as a consequence of rule-less Anglo-Saxon capitalism. They did not need to build consensus (although they might have liked to), but instead needed to disrupt the existing consensus among economists, so as to provide themselves with greater freedom to undertake the actions they saw as appropriate. Events provided them with the opportunity to help legitimize economists whose ideas fitted with an alternative account of the crisis.

In the remainder of this article, we test how well these different accounts explain the observed facts—the sudden emergence of a new Keynesian consensus in 2008–2009

among advanced industrialized democracies, the apparent conversion of Germany (the major holdout against Keynesian demand management policy) to fiscal stimulus in 2009, and the breaking down of the apparent consensus in 2010. Since the crucial debates were conducted via publicly visible speech, we rely substantially on publicly available material in order to map out the debates, supplementing this with interviews with a small number of key actors who represented different viewpoints in the debate. While this strategy is not exhaustive, it plausibly maps the major lines of argument during the relevant period.

Our intention is to examine how the structures associated with different accounts explain the ways in which debates unfolded. Following Krebs and Jackson (2007, 36), we do not try to determine the specific micro-mechanisms through which ideas had consequences. Instead, we ask whether more traditional arguments about bargaining and ideas can explain observed outcomes, or whether outcomes are better explained by the two-way interaction between the relevant professional community and policymakers across the hinge of macroeconomic policy debates.

Hence, our argument deliberately does not make any universal claim that actors were guided by a logic of communicative action, or sincere persuasion, or, for that matter, strategic manipulation. Instead, it focuses on the causal consequences of the *larger structures* within which a variety of actors, with a variety of perspectives, aims and approaches to communication, were embedded (see also Ban 2016, 6). We think of ideas as diffusing through processes including learning, lip service, imitation, and two-way communication, and look to analyze how the processes of diffusion were shaped by professional and policy structures and networks.

### The Resurgence of Keynesianism in the Crisis

How did international debates among economists shift so much in the 2008–2009 period? The Keynesian resurgence was not entirely a product of the economic crisis. Keynesianism had begun to re-emerge before the crisis proper hit. The Bush administration introduced a bipartisan stimulus package in early 2008, believing that it faced a short V-shaped recession (Bernanke 2015, 191–92; Paulson 2010, 87). Dominique Strauss-Kahn, a pragmatic Keynesian (Ban 2015a) and the Managing Director of the IMF, pressed for fiscal action at Davos, prompting Larry Summers to note that “This is the first time in 25 years that the IMF managing director has called for an increase in fiscal deficits” (Giles and Tett 2008). However, it was only as the recession began to change into an actual crisis after September 2008 that Keynesianism really began to shape debate.

By late 2008, economists such as Barry Eichengreen (2008) were making the case for aggressive coordinated fiscal policy. Under Keynesian theory, active fiscal policy may be necessary to break out of a liquidity trap, helping the economy return to stability (Quiggin 2010). However, in an open global economy, Keynesian demand stimulation strategies may just boost demand for imports, limiting their domestic benefits, and creating incentives for free-riding. Hence a coordinated international response was needed.

Anti-Keynesian economists failed to make a politically visible case against Keynesian policy. As the IMF's then-chief economist Olivier Blanchard (interview with Olivier Blanchard, April 2011) noted, “it is interesting that the fears about higher debt and the problem of fiscal

consolidation were nearly totally absent from the debate” in the first stage of the crisis. While Barro and Redlick (2009) did make the textbook argument that Keynesian policies would be self-undermining if individuals rationally anticipated the future, they found little support from fellow economists. Eventually, other anti-Keynesians, such as Eugene Fama and John H. Cochrane, both at the University of Chicago, made similar arguments in short papers (often on their personal webpages). However, their arguments were swiftly greeted with counterarguments from Paul Krugman, Brad DeLong, and others, published in higher-visibility venues. Although anti-Keynesians had succeeded in reshaping theoretical arguments in economics, they were often less experienced in policy debates. As described by Paul Krugman (interview with Paul Krugman, April 2011):

Freshwater economists were not that keyed into policy ... It's been a selection process to some extent ... Initially, Barro was there, but on the domestic side, you were talking about people who were not economists, or who were Austrians [i.e., subscribers to a minority approach in economic theory and libertarian philosophy associated with von Mises and Hayek] ... if your view about policy is mostly that the government shouldn't do it, it's possible to write two articles a month saying that, and if you are Milton Friedman you can carry it off and get a large audience, but ... it's harder than it is to be weighing in on stuff the government should be doing.

The result was that these criticisms were isolated and marginalized.

I don't recall a lot of criticisms back in late 08–09 that were sticking in any way. You are always going to get that craziness on the back pages of the *Wall Street Journal* but I don't think many people take that seriously. (interview with Jared Bernstein, former economics adviser to Vice-President Joseph Biden, July 2011)

US Republicans tended to base their counterarguments to the administration's stimulus policy on apparent common-sense claims about runaway government spending (Blinder 2013, 226), rather than expert economic theory. The conversion of free-market advocates such as Richard Posner and the prominent anti-Keynesian Martin Feldstein to the case for stimulus (Uchitelle 2009) helped bolster the impression of a new apparent consensus about the benefits of fiscal stimulus among expert economists.

The new consensus was swiftly transmitted through international institutions such as the IMF. On November 15, 2008, Dominique Strauss-Kahn proposed a global fiscal stimulus program to the G-20, suggesting that a stimulus of 2% of world GDP was necessary to help maintain growth (Andersen 2009). The absence of dissent within the IMF, an institution that had until recently been associated with very different economic ideas, was remarkable, even if it was also shaped by hierarchical relations (Ban 2015a, 174). As described by Blanchard, there was

capital controls, which had been gigantic ... I don't know if everyone loved it, but basically the troops just went along. (interview with Olivier Blanchard, April 2011)

Senior officials at the European Central Bank were far more skeptical about fiscal stimulus, which sat uncomfortably with the Stability and Growth Pact. They repeatedly stressed financial confidence, EU rules on deficit reduction, and the need to return to fiscal consolidation.<sup>8</sup> However, they systematically declined to criticize Keynesian policies as such (see Trichet 2009). As described by a senior ECB official,

At the time, we were cautious in saying well, there may be some in a better position fiscally, notably Germany and a couple of others, where we wouldn't necessarily object, but there were others who were in no position to open the purse and lavishly spend [on] all sorts of discretionary spending programs. (interview with senior ECB official, March 2011)

While ECB officials were privately unhappy about Keynesian demand stimulation, they refrained from openly expressing their disquiet (interview with senior ECB official). The expert consensus among economists over the benefits of Keynesianism was not only the result of prominent conversions, but of reticence among the unconvinced.

This apparent agreement had important consequences for the actions of politicians. Before the crisis, policymakers in the advanced industrialized democracies had largely abandoned activist fiscal policy (Blinder 2004). However, after the crisis hit, policymakers urgently needed to identify tools to shore up an international economy. This created a confluence of need between (some) expert economists, who wished to establish the legitimacy of Keynesian analysis and Keynesian policy, and (some) policymakers who urgently needed tools to address the crisis. Politicians started to identify the economic crisis as involving a crisis of demand, committing in November 2008 at the first summit of the G20 to introduce “fiscal measures to stimulate domestic demand to rapid effect.”

This tendency was especially marked within the US government. The incoming administration included several prominent academic economists, who were either already tacitly Keynesian or had become convinced thanks to the crisis (Scheiber 2012). They agreed that a substantial stimulus was needed, while disagreeing over its size (Geithner 2014, 262–63; Scheiber 2012, 29–61; Suskind 2011, 152–54; Lizza 2009). The administration's deliberations were strongly influenced by input from outside economists. Paul Krugman's columns advocating a more activist economic policy had visible influence on Obama's thinking (Suskind 2011, 184–5). Other pro-Keynesian economists such as Joseph Stiglitz, Laura Andrea Tyson, Kenneth Rogoff, and Alan Blinder provided important informal support for active fiscal policy (Suskind 2011, 153).

These internal government deliberations were reflected in a stream of public communications aimed at making

incredibly little debate within the institution, relative to some of things such as the debate we had on

<sup>8</sup>The full corpus of speeches is available at <https://www.ecb.europa.eu/press/key/speaker/pres/html/index.en.html>.



the economic case for a stimulus both to the expert community and the broader public (see [Council of Economic Experts 2009](#); [Romer 2009](#)). The Council of Economic Advisers issued a series of reports that used data and economic modeling to argue that the stimulus monies had been spent wisely, that it had saved hundreds of thousands of jobs, and that it had contributed a substantial amount to US GDP ([Council of Economic Advisers 2010](#)).

The impact of economists on European debates was less direct, but equally important. As described by one key participant in European policy debates:

The economists were in agreement in Europe to a large degree and the politicians were more reluctant, more uncertain because this was so much of a change compared to the usual way, the usual priorities. They were slower to be convinced ... I think that what political leaders got from the economists was that people traditionally opposed to fiscal stimulus and fiscal deficits ... suddenly had a different view. That impressed the politicians. (interview with Jean Pisani-Ferry, then-head of Breugel, November 2010)

By advocating straightforward Keynesian remedies, economists made it difficult for governments (who wished to be seen responding to the crisis) to avoid some form of fiscal stimulus. Governments began to engage in fiscal policies aimed at boosting demand through direct government spending. The beginning came in November 2008, when the UK announced a UKP 20 billion package, justifying their intervention in advance with explicitly Keynesian arguments ([Hennessy 2008](#)), and China more or less simultaneously announced a large boost in domestic spending ([Skidelsky 2009](#), 19).

The United States took a little longer because the new administration was not in place until January 2009. Incoming administration officials also wanted to coordinate an across-the-board stimulus among advanced industrialized economies, especially in the EU. For the most part, they encountered little resistance. European economists closely followed the arguments that were taking place among elite American economists within the blogosphere and via the *New York Times* and the *Financial Times* (interviews with Ferry, senior ECB official). The European Commission, which had been largely excluded from the debate on bank rescues, seized upon a coordinated stimulus as a way to demonstrate its relevance to the crisis. It prepared a plan under which each EU member state would commit to a stimulus package of 1% of GDP ([Commission of the European Union 2008](#)). The Commission's Director-General for economic and financial affairs, Klaus Regling, had described Keynesians in a previous recession as "like rats [coming] out of a wall" ([Schlesinger 1999](#)). He now found himself, to his own surprise, agreeing that fiscal stimulus was the appropriate response (interview with Jean Pisani-Ferry; see also [Spiegel 2015](#)).

However, one key group was visibly skeptical about Keynesianism—German policymakers. Germany was less badly affected in the initial stages of the crisis than most other European countries.<sup>9</sup> Both conservatives (the CDU)

and social democrats (the SPD) were primed by "ordoliberal" ideas ([Blyth 2013a](#), 109–11; [Matthijs 2016](#), 384; [Vail 2014](#), 74–75) and an anti-inflation consensus among both economists and voters to oppose activist fiscal policy. The origins of the crisis in dubious banking and financial market practices also helped play to German preconceptions about economic order ([Blyth 2013a](#)). Germany's long-term hostility to stimulus policy and more particular complacency about the economic crisis led senior German politicians in both governing parties to vigorously oppose any substantial fiscal stimulus, instead clinging tightly to the earlier consensus that fiscal policy was useless ([Blyth 2013a](#)). As German Finance Minister Peer Steinbrück put it in an interview on December 5, 2008:

The same people who would never touch deficit spending are now tossing around billions. The switch from decades of supply-side politics all the way to a crass Keynesianism is breathtaking. ([Theil 2008](#))

Initially, the pressure on Germany to introduce a stimulus was largely external, emanating both from EU and US initiatives ([Newman 2010](#)). Steinbrück tried to scotch any EU-level initiative in early September, claiming that "Every country is responsible for itself ... it makes no sense to burn money." When it became clear that other member states were likely to support the Commission's proposal, the German government grudgingly announced that this was acceptable—as long as previously announced spending counted toward the requirement ([Vail 2014](#)).

Persistent external pressures began to combine with increasing dissent within Germany, in particular from elite German economists ([Vail 2014](#)), who had been influenced by debates among their international colleagues. Economists play an unusually prominent and independent role in German policy debates—public statements by the Council of Economic Experts receive extensive media coverage. From the early 1970s on, the Council had been vehemently anti-Keynesian. In 2008, after vigorous internal discussions, they did an about-face, issuing a statement finding that the initial fiscal stimulus was inadequate, and that a much stronger stimulus was needed ([Council of Economic Experts 2008](#)). This *volte face* was part of a remarkable turnaround among German academic economists more generally ([Dullen 2008](#)). Anti-Keynesians too perceived this shift as widespread in the German economics profession. In debate with Bert Rürup (the head of the Council of Economic Experts), the prominent conservative economist Stefan Homburg lamented that

you (Rürup) and the Council of Economic Experts have told us over the years that stimulus programs do not work. You even say this in your current report! In a period of high unemployment, the Red-Green coalition did not launch any stimulus program, as it knew this would be fruitless ... we make ourselves hard to believe as economists when we fantasize, without any secure evidence about the worst crisis of all time, and then drag up recipes from the cellar that we held to be false last year. I simply cannot understand how so many economics professors have done a complete about face [diametral ihre Position ändern]. Have they all gone crazy? [author's translation] ([Von Neubacher and Sauga 2009](#))

<sup>9</sup>Yet this did not explain Germany's policy stance. Australia too seemed at first relatively immune to the crisis, but introduced a large stimulus package before the economic indicators turned sour (discussion with Australian Treasury Official, February 2011).

In an interview, Homburg elaborated as follows:

By and large, Germany followed the international mainstream, set forth by [the] US and UK . . . I think [that the reason German professors “all went crazy”] is due to “social contagion,” as Robert Shiller calls it. I was a bit angry, admittedly, because I think scientists should follow a less emotional mode. [email interview with Professor Stefan Homburg, January 1, 2011]

Economists were not the only critics of German anti-Keynesianism. Other actors within Germany—most notably large firms and unions—started to push for a stronger stimulus. Nonetheless, the government’s furious response to the Council of Economic Experts’ report, combined with the more general about-face among economists, provides strong *prima facie* evidence that the Council’s report inflicted real political damage. The leader of the SPD’s Parliamentary Party condemned the Council of Economic Experts as “incompetent” and “surplus to requirements,” claiming that these “so-called wise men mostly produce hot air,” and proposing the institution’s abolition (*Frankfurter Rundschau* 2008). The Minister for the Environment claimed that the Council had, in the space of a few weeks, “turned 180 degrees. They used to tell us to concentrate on fiscal consolidation above everything else, but now suddenly this is worthless” (*Frankfurter Rundschau* 2008). German chancellor Angela Merkel felt it necessary specifically to attack the expertise of economists in her keynote address in December 2008 to the CDU party convention. She complained that Germany had too often put its trust in experts that were not really experts, and should instead rely on good German household economics and common sense, forswearing any “senseless competition of billions” (Merkel 2008).

Merkel’s speech accorded with increasingly vituperative comments from Steinbrück in the lead-up to the European summit, describing the UK stimulus as “crass Keynesianism” that did not “even pass an economic test” (Theil 2008). The UK responded by noting “a broad international consensus that a fiscal stimulus is [the] right thing for economies now” (BBC 2008). However, by the time that the summit was held, Merkel had begun to moderate her position. She accepted that Germany, as Europe’s biggest economy, had a “responsibility” to provide its share of the stimulus package. The European Summit closed with broad agreement on an EU-wide economic stimulus of around 200 billion euro (170 billion of which would be spent by member states).

In January 2009, the German government announced a second—and much more substantive—domestic fiscal stimulus of 50 billion euro (Vail 2014). This abrupt change can in part be traced back to a meeting that Merkel held shortly after her speech, with a select group of economists and business leaders (Walker 2008).<sup>10</sup> They persuaded her that her continued opposition to a stimulus was becoming a political liability. However, this was not a simple matter of electoral calculation. Although a federal election was scheduled to take place in later 2009, the conventional partisan logic was dampened by the fact that the two parties potentially capable of winning, the

CDU and SPD, were both in government, and both directly associated with an anti-stimulus position.<sup>11</sup> Instead, the shift in expert consensus, and in particular the unexpected criticisms from the Council of Economic Experts, played a key role in turning the government’s reluctance to embrace stimulus into a political weakness (Vail 2014).

The resurgence of Keynesianism is difficult for both non-ideational and existing ideational accounts to explain. Non-ideational accounts, such as that of Daniel Drezner, certainly help explain which policy actors were important. In the absence of formal international institutions, political debates about macroeconomic stimulus quickly became arguments between states in which some states counted for more than others. From Drezner’s perspective, it is not at all surprising that the major policy disagreement played out between two powerful states with big markets—the United States and Germany. Had other countries, such as China, not been willing to go along with the Keynesian consensus, it is plausible that a three-way rather than two-way argument might have developed.

However, while power-based accounts can explain which states had clout at the international negotiating table, they do not explain why the positions of those states changed over time. In particular, they do not explain why one state—Germany—moved from diehard anti-Keynesianism to introducing a substantial fiscal stimulus package of its own. Neither Germany’s international bargaining strength nor the apparent underlying preferences of its leaders changed. Germany’s bargaining power, if anything, increased during the first period (as its markets appeared to be less damaged than those of its competitors, increasing both its potential bargaining clout and the apparent legitimacy of its mode of governance). Nor, finally, is there any available evidence that Germany changed position thanks to threats or promises made by other powerful states. The plausible channels of influence to explain this change involve ideas rather than power-based bargaining.

However, standard ideational accounts do not explain the creation of a consensus around Keynesian stimulus strategy either. The interactions among expert economists do not appear to have involved the kinds of sober discussion and testing of arguments favored by scholars who work on epistemic communities. Instead, the turn toward Keynesianism among economists resulted from processes of debate midway between trench warfare and intellectual contagion. Ideological accounts, for their part, would have predicted a far higher degree of stability in the ideas held by experts than, in fact, transpired. Finally, there is some support for the argument that personnel dynamics within organizations such as the IMF helped change their approach to fiscal stimulus (Ban 2015a). However, even here, the key consequence of the advent of younger and less orthodox economists was to increase interconnectedness between the organization and a broader academic mainstream within which the truly important ideational changes were happening (Ban 2015a).

An account that focuses on how disputes over Keynesianism created a hinge between debates among economists and debates among economic policymakers explains how the apparent new consensus over Keynesian stimulus policy emerged. The key factor was a confluence between the consensus-shaping efforts of a (highly visible) group of expert

<sup>10</sup>We are grateful to Marcus Walker for highlighting the prominence of this meeting in a personal communication.

<sup>11</sup>We are grateful to Nolan McCarty for pushing us to address electoral considerations.



economists and the needs of a group of key policymakers. Factions within the academy and among policymakers favored active fiscal intervention, creating a hinge between the economics profession and policymakers. Keynesian economists saw the crisis as a vindication of their perspective, and of the urgent need to avoid the mistakes of the Great Depression (Blyth 2013a, 43–45). US policymakers needed intellectual justification for active intervention within the economy.

This led both of them to converge upon a specific version of Keynesianism—which stressed his lessons on how to get out of demand traps—both to revive the intellectual capital of Keynesianism within the academy, and to provide the basis for economic stimulus policies. The apparent academic consensus helped convince many policymakers, who might otherwise have been skeptical, to adopt a Keynesian approach. Equally, the marked political salience of Keynesianism helped further bolster it within academic debate. At the American Association meeting in 2009, the economics mainstream shifted from marked hostility toward Keynesian prescriptions to a nearly complete apparent agreement on the value of fiscal stimulus. This built directly on (and sought to inform) the Obama administration’s proposals for spending (Uchitelle 2009). As Figure 4 illustrates, fiscal policy became a hinge issue for academic economists and for policymakers in both the United States and Germany. US policymakers had significant influence on (and a reciprocal relationship with) the economists responsible for the new apparent consensus on Keynesian policy, while German policymakers had no corresponding friendly and prominently visible party within the academy that they could work together with. Instead, they were told by their own Council of Economic Experts that they needed to shift toward fiscal activism. Hence, German policymakers found themselves receivers rather than influencers of the new set of ideas.

As conventional international relations approaches would predict, power relations helped determine which states “counted” in international discussions. However, the internal dynamics of the economics profession also helped determine how economic argument intersected with policy discussion (Fourcade et al. 2015). A relatively small number of “star” economists, mostly based in the United States, dominated academic debate in ways that effectively encouraged those with dissenting views to convert or to remain silent. It is difficult to imagine any German economist, no matter how prominent, playing the role in US debate that Paul Krugman played in German and European discussions. What happened outside the United States was relevant to star economists, both for reasons of professional legitimacy and sincere commitment, but it mattered more as object lesson than source of intellectual influence. Hierarchical relations, combined with the difficulty that anti-Keynesian economists had in finding and building a policy audience, generated a perception of expert consensus, which in turn had consequences for the policy debate.

The specific institutional bridges between academic debates and policymaking also shaped ideas in important ways. In the United States, the Council of Economic Advisers served as a bully pulpit for a pro-Keynesian administration. Through speeches and papers, the Council helped the administration make a public case for stimulus policy that also reverberated within the economics profession. In Germany, in contrast, the Council of Economic Experts played an independent role. It translated a consensus among expert economists into public political arguments that undermined the government’s case, rather

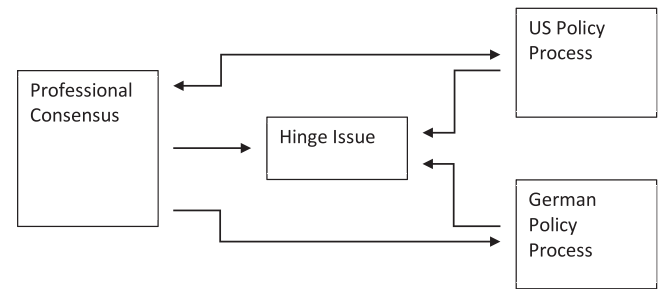

**Figure 4** Relationship between professional consensus and policy processes in first stage of crisis.

than translating the government’s preferences into economic debates. This visibly weakened the government’s case against fiscal stimulus. Germany’s decision finally to acquiesce to the consensus and adopt a very expensive stimulus plan, despite continued doubts, was of course not a simple product of the apparent consensus among economists. Other factors, including pressure from domestic interest groups, intersected with expert opinion. Yet, without the frame offered by expert consensus, political groups would have had great difficulty in articulating their demands and coalescing around them (Blyth 2002, Chapter 1).

#### Backlash—Austerity and Keynesianism in 2010

The Keynesian revival was relatively short-lived. By mid-2010, Keynesians were lamenting that they had lost the war (DeLong 2010).

By early 2010, the financial crisis threatened the solvency of a few beleaguered governments. The economic impact of the crisis in these countries was comparable to that of the Great Depression. Nonetheless, these countries were not big enough to pose a significant threat to the global economy.

However, these cases helped dissenters in both the economics academy and policy debate reorient the argument about fiscal stimulus to one over how and when to make a transition from Keynesian fiscal stimulus to fiscal retrenchment. In principle, both Keynesians and non-Keynesians agreed on the need to make this transition. In contrast to the “Keynesian” policy synthesis of the 1960s and 1970s, latter-day Keynesians mostly saw fiscal stimulus as a means of dealing with economic shocks (Quiggin 2010, 7). Keynes himself had noted in 1937 the need to accumulate fiscal surpluses during good years, so as to provide more room to stimulate the economy during bad times (Keynes 1937). Blanchard and two colleagues sought to make the case for just such a moderate Keynesianism in a widely circulated OECD paper (Blanchard, Dell’Ariccia, and Paulo 2010). Others, who had been less convinced of the merits of Keynesianism in the first place, at least agreed that a return to normal times would be a good thing.

However, there was vigorous disagreement among economists about *when* such a transition should take place. Some economists revived the old argument that austerity—deliberate cuts in government spending—had inherent economic advantages (Blyth 2013a). Alberto Alesina, an Italian expatriate economist at Harvard, claimed together with Silvia Ardagna (Alesina and Ardagna 2009) that fiscal retrenchment could enhance countries’ growth prospects by improving investor confidence (Helgadóttir 2016). Others, such as Paul Krugman, strongly disagreed on

empirical and theoretic grounds, arguing that the retrenchment advocated by “Austerians” might imperil a fragile recovery (Blyth 2013b, 165).

Nonetheless, the debate among elite economists was nowhere nearly as one-sided as in 2008–2009. Important skeptics of Keynesianism were more willing to go on the record. The prominent macroeconomist John Taylor, who in the early days of the crisis had sought to frame tax cuts as a more effective form of stimulus, now argued that the historical evidence showed that fiscal stimulus did not work (Taylor 2011). Taylor, Krugman, DeLong, Fama, and other economists engaged in increasingly personalized and bitter disputes over how to interpret the evidence. Nor were the criticisms confined to anti-Keynesians. As time passed, widely respected economists such as Jeffrey Sachs and Kenneth Rogoff (who had previously privately supported calls for a larger US stimulus [Suskind 2011, 153]) began to call for retrenchment. In a widely read paper, Rogoff and Reinhart (2010) argued that high debt burdens hurt growth, implying that states should move from stimulus to budget retrenchment as quickly as possible. Keynesians could surely argue against these economists, but they could not easily dismiss them as fundamentally inept.

These discontented economists received tangible support from policymakers who were unhappy with the prospect of continued stimulus. Alesina (2010) presented a short paper summarizing his arguments about confidence effects at the April 2010 meeting of the EU’s economics and finance ministers. This paper was then cited in the meeting’s official communique (Islam and Chowdhury 2012), legitimizing Alesina’s arguments as a core influence on emerging European policy. Alesina’s claims had a broader impact on international political debate, much to the alarm of pro-Keynesians. As the crisis seemed to abate, European Central Bank officials used public arguments about the timing of retrenchment to condemn fiscal deficits and reassert their authority (see Gonzales-Paramo 2010).

Bank officials were increasingly comfortable in arguing against Keynesian fiscal stimulus, and in favor of an alternative approach that built on Alesina and Ardagna’s arguments about confidence effects (Islam and Chowdhury 2012). As described by one senior bank official in an interview:

we started to change tune and say “well, Keynesian multipliers are not the only thing to look at, there are also so-called confidence effects ... the Ricardian effect ... will restrain consumption rates today which will mean that you negate the whole effect you had in mind. And vice versa, if you can prove today that you are fiscally responsible, consumers will know that there will be no further tax increases coming, and might refrain from cautionary savings, which will help you further on the real side ... There has been a great paper by John Taylor at the time that looks at discretionary fiscal expansion programs in the US over 50–60 years, and found their effects to be at best ambiguous and at worst actually harmful ... We’ve been doing the econometrics of this for decades now—we have come to some sort of consensus which basically went out of the window within weeks. I don’t think it ever really went out of the window in the ECB.

Such claims were supported by the European Commission. It began to argue against further fiscal

stimulus, and in favor of initiatives (which would not coincidentally expand the Commission’s competences) to support fiscal rectitude in the member states (Commission of the European Union 2010).

These arguments were brought to a head by the Greek crisis. During the 1990s, Greek governments had engaged in a variety of subterfuges to hide the true extent of their debt. When a new Greek government began to clean house, and it became clearer exactly how indebted Greece was, markets began to panic. In addition to spurring reforms aimed at preventing fiscal crises in EMU member states, this helped Germany, the European Central Bank, and other actors who advocated fiscal retrenchment push for greater austerity (Blyth 2013a, 50). The ECB’s president, Jean-Claude Trichet, privately berated EMU member states for their persistent fiscal irresponsibility in the past, and informed them that they had little choice but to adhere rigidly to the rules if they wished to avoid future crises (Barber 2010). He also began to take a much stronger position in public debate. In an op-ed for the *Financial Times* that the newspaper described on its own front page as “strident,” Trichet condemned the “oversimplified message of fiscal stimulus,” and sought to build on what he described as a new consensus for retrenchment (Trichet 2010).

German policymakers’ analysis of the 2008–2009 crisis as a crisis of fiscal profligacy and bad debt was reinforced by the argument that markets would brutally punish states that did not move toward fiscal austerity. The empirical evidence was muddy (O’Rourke 2010; Rodrik 2010). However, the *rhetorical claim* that markets “wanted” fiscal austerity provided a common ground between economists accustomed to lecturing governments about the important disciplining role of markets and some policymakers who were looking to move from Keynesianism toward austerity. This time, Germany was not stymied by divergence from the intellectual consensus. There was no such intellectual consensus—instead, there was a debate between those advocating (on the basis of economic reasoning) continued fiscal stimulus, and those advocating (on the basis of economic reasoning) various flavors of economic austerity. When Paul Krugman harshly criticized Germany’s renewed emphasis on austerity in his *New York Times* column and in an interview with *Handelsblatt*, the head of the Sachverständigenrat responded by arguing that further stimulus was inappropriate and likely impossible. The German Finance Ministry was able to leverage this disagreement so as to position itself on one side of an ongoing debate among experts:

Politicians from different nations and academics representing different schools of thought are currently split. Is it time to withdraw debt-financed stimulus programmes launched because of the economic crisis and get badly hit public budgets back on track? Or is the perceptible recovery still so fragile that we need more stimulus to keep the economy going? US economist Paul Krugman recently advocated the latter. He argued that savings measures such as those being planned by Germany were premature and jeopardised (global) economic recovery. His prescription: More stimulus financed by even more government debt. He said that if need be we have to run the risk of higher inflation. Numerous economists ... oppose this and defend the strategy also being pursued by Germany.

... further stimulus is superfluous, and at worst, even dangerous, especially in view of the risk of higher inflation ... On the basis of empirical studies, economic expert Wolfgang Franz demonstrates that we can generally consider ourselves lucky if the state's financial deficit at least produces an equivalent increase in GDP ... Conclusion: Another round of stimulus in an upturn is not worthwhile. (Bundesministerium der Finanzen 2010)

This split became ever more important in the lead-up to the G20 summit of June 2010. At the previous meeting, governments had reaffirmed their commitment to fiscal stimulus until the world economy showed clear signs of recovery. The United States, which wanted to strengthen this affirmation, persistently put pressure on Germany, culminating in a letter from President Barack Obama warning of the global economic risks of a premature withdrawal of fiscal stimulus programs. German officials proved unbending:

Behind the calls for us to pursue a more expansionary fiscal course lie two different approaches to economic policymaking on each side of the Atlantic. While US policymakers like to focus on short term corrective measures, we take the longer view and are, therefore, more preoccupied with the implications of excessive deficits and the dangers of high inflation. (Schäuble 2010)

German officials and the leadership of the European Central Bank tacitly combined to exploit the new arguments being made by anti-Keynesian economists and justify a turn to austerity. The United States, which was having domestic difficulty persuading Congress to pass a further stimulus package because the pre-Obama administration bipartisan consensus around stimulus had evaporated, lost (Blyth 2013a). The final communique effectively ended efforts to coordinate further fiscal stimulus policies at the international level. European politicians used the arguments of US economists to push for further retrenchment in Europe. German finance minister Wolfgang Schäuble argued that “We have read the study by Rogoff and Reinhart very carefully. They have demonstrated empirically that beyond a certain level, public indebtedness becomes damaging to growth” (Schäuble 2012).

In the intervening period from 2010 onward, fiscal expansion was followed by contraction or relative stagnation in all the major OECD economies, leading to an increased reliance on monetary policy in the United States, and eventually the EU, where Trichet's successor, Mario Draghi, has pushed for a form of “quantitative easing” to stimulate the economy. Keynesian macroeconomics, in various forms, is resurgent in the academic profession, and in major policy institutions, like the IMF. Academic critics of Keynesianism remain prominent and visible. In combination with the continued dominance of austerity advocates in bodies like the European Commission, this has allowed the political opponents of Keynesianism to maintain their position.

In February 2016, continued problems in the world economy led the International Monetary Fund to call bluntly for “bold multilateral actions” that would use available fiscal space to boost investments, while the United States argued that countries like Germany needed to engage in fiscal stimulus for the benefit of the world economy (Donnan 2016). However, again Germany was successfully able to push back, telling other countries that it was “strictly against

announcing publicly that the G-20 is preparing a stimulus program” (Talley 2016). As in 2008, Keynesian commentators like Barry Eichengreen (2016) have sought to make the case for stimulus in public. This time, however, they have been driven to near despair at the unlikelihood of any concerted action—Eichengreen compares Germany's stance to the pre-Civil War South's resistance to federal desegregation programs. While it is possible (though far from inevitable) that the Trump administration may introduce a domestic stimulus package in the United States, it is less likely even than the Obama administration to persuade other countries to follow suit.

This apparently stable dissensus reflects the outcome of arguments in 2010. Just as conventional power-based approaches do not explain the change in Germany's position in the first stage of the crisis, they do not explain why Germany was able to successfully beat back pressure over fiscal stimulus in the second. There was no visible shift in conventional indices of bargaining power. The important shift was the emergence of the Greek crisis, which provided Germany and the European Central Bank with increased institutional and rhetorical resources thanks to a new crisis situation that appeared to illustrate the dangers of weak institutions and profligate spending. Debates over ideas were not determined by political bargaining, but rather seem to have shaped bargaining processes. German negotiators were able to invoke the arguments of economists who warned about the risks of high debt and deficits.

However, again, conventional ideational accounts have limited purchase. The angry disputes between pro-stimulus and anti-stimulus economists did not resemble the disinterested processes of scientific inquiry described by scholars of epistemic communities. The ideas of experts were not nearly as stable as ideological accounts would predict. They shifted in important ways as some previous converts to demand stimulation policy moved back to the pro-austerity camp.<sup>12</sup> Nor did internal organizational processes play any observable role in shaping macro-level arguments over stimulus policy. Most importantly, however, it is clear from the record that the relationship between expertise and policy implementation was not one way. Indeed, a key reason why ideas about austerity were resurrected within the academy, creating visible disagreement and dissensus, was that European policymakers took them up and promoted them, meaning that they had to be taken seriously by other scholars, even those who vehemently disagreed with them. Standard ideational accounts that tend to treat experts as “givers” and policymakers as “takers” of ideas have little insight to offer into the two-way dynamic through which scholarly ideas provided legitimacy for dissenting policymakers, who in turn were able to provide visible support that enhanced the legitimacy of these ideas in scholarly debate.

Again, the literature on professions provides a better understanding, allowing us to understand how the apparent new consensus of the previous eighteen months dissolved. As Figure 5 shows, fiscal policy remained a hinge issue for the economics profession and for policymakers in the United States and Europe.

This time, however, the relationship between Germany and its allies in the European Central Bank on the one hand, and the economics academy on the other, was two way. Factions within both the economics profession and policymaking, which had been discommoded by the apparent

<sup>12</sup>However, one should note that the emphasis of the ideology account on coercion plausibly helps explain how fiscal austerity was implemented in Southern Europe.



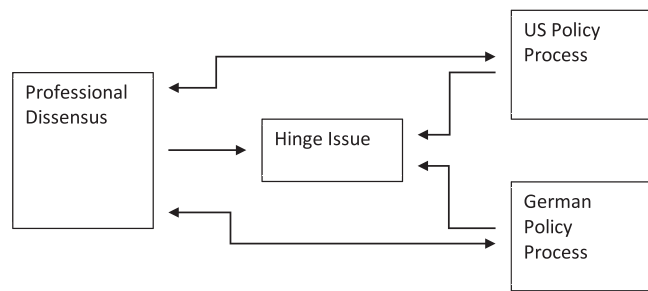

**Figure 5** Relationship between professional dissensus and policy processes in second stage of crisis.

triumph of Keynesianism, were able to work together toward related goals. On the one hand, anti-Keynesian economists were able to build counterarguments against Keynesians, arguing that confidence effects meant that economic stimulus would in practice be self-undermining. On the other, they were able to widen disagreements among Keynesians over when it was appropriate to end stimulus policies. Here again, intra-professional structures worked as sociologists of the professions would predict. The key proponents of the anti-Keynesian case were “star” economists located at highly prestigious institutions. They were also based in the United States. Again, economists who were advantaged by the structures of the profession were more likely to be influential within it, and more likely to be cited by policymakers outside it, even policymakers outside the United States.

These ideas also gained legitimacy within the academy because of their positive political reception outside it. As Fourcade and others have noted, internal prestige within economics depends in important ways on its visible impact on policymaking. The structure of the institutions mediating the relationship between the profession of economics and policymaking had important consequences. One of the reasons that Germany was better able to shape debates over macroeconomic policy than at the previous stage was that it was able to take advantage of a far more congenial institutional landscape. The debt crisis brought European institutions, where Germany had greater influence, to the fore. The Greek crisis highlighted the role of the European Central Bank, which was highly sympathetic to German concerns, and the European Council of Ministers, where Germany had outsized influence. The decision of European finance ministers to ask Alesina to write and present a paper to them conferred legitimacy on his arguments, exactly because the prestige of economics depends significantly on perceived influence on policy debates outside it. Hence, the initial appearance of expert consensus gave way to a perception of real and substantial dissensus among experts, providing dissenting policymakers with greater freedom of action. Factions of economists within the profession, and policymakers outside it, respectively worked to increase the visible influence of non-Keynesians, allowing policymakers to take deviating actions more easily. Those factions of economists that had favored Keynesianism in the academy, and demanded stimulus strategy in the policy world, found it more difficult to make headway than they had in the recent past.

### Conclusion

We argued that the rise and partial fall of a new Keynesian consensus during the recent economic crisis is best explained through building on the work of sociologists of the professions, such as Marion Fourcade, Andrew Abbott, and Elizabeth Berman. The ability of different subgroups

in the crisis to press their preferred understandings and solutions was shaped both by the internal structures of the ecologies in which they worked, and by the relationship between these ecologies.

Our arguments have striking implications for both the specific case and the broader study of international political economy. First, they provide a clearer understanding of the role that ideas played during the economic crisis. Even if, as Martin Wolf (2014, 12) argued of the crisis, “It is in the last resort, ideas that matter,” one needs to explain *how* they mattered. Our argument shows how ideas and politics were inextricably intertwined, providing support for scholars like Blyth (2002) in their arguments with scholars such as Lindvall (2009), who see expert ideas as being fundamentally apolitical.

More broadly, Seabrooke and Wigan (2016, 361) point out that “experts have not been given sufficient attention in the ideational literature.” They call for an account of expertise and ideas that is better grounded in the actual social structures that experts and other actors occupy. Our study shows how social structures—specifically the community structures of the academic and policymaking worlds, and how they intersect—can have crucial consequences for the role of ideas. It moves away from the reified accounts of expert ideas that characterized an earlier generation of scholarship about epistemic communities. This allows us to understand how specific factions of actors within an expert community can work together with specific factions of actors in the policy community. “Hinge” issues allow factions in different ecologies to achieve parallel goals.

This then, together with the work of other emerging scholarship on expertise (Chwieroth 2015; Faulconbridge and Muzio 2008; Fourcade 2009; Harrington 2012; Seabrooke 2014), and broader structures of communication and compulsion (Ban 2016), helps spell out an exciting research agenda that spans sociology—and especially economic sociology—and international relations. It is at least highly plausible that similar relationships exist in other areas where the ecologies of expertise and political decision-making intersect, such as human rights (Keck and Sikkink 1998), economic development (Best 2014), “military contracting” (Avant 2016) military intervention (Saunders forthcoming), and financial regulation (Simmons 2001).

This has many potential implications for scholarship on the international role of ideas. We conclude by focusing on two.

First, the large majority of existing work seeks to understand the politics of ideational consensus—how it is that actors reach agreement on shared ideas, and how actors may shift from one consensus to another. Our work suggests that apparent dissensus—the appearance of continuing disagreement among experts—may be equally important to policy outcomes. An internal tobacco industry memo, summarizing how the industry ought to subsidize contrarian science, famously argued that “doubt is our product.” This suggests that industry actors were happy to perpetuate a dissensus that stymied coordinated policy action. The strategies of actors looking to block movement on climate change (Oreskes 2004), international regulation of small arms (Bob 2010), and other such controversial questions often follow a similar logic. Moreover, we think it equally plausible that politics will shape and reinforce genuine scientific disagreements as it does manufactured ones.

Second, we should move away from monodirectional accounts of ideas and ideational diffusion. These see ideas as straightforwardly shaping politics (or vice versa).<sup>13</sup> Instead,

<sup>13</sup>See, for example, Weaver (2008) on how ideas and practice at the World Bank are shaped by its reliance on states.

we should look at *two-way processes*, in which factions and communities work together or at cross purposes across different ecologies. Doing so allows us to map the two-way interplay between these different ecologies, in which factions of experts influence policy discussions while factions of policy actors can work to reshape discussions among experts in ways that redound to their particular advantage. To be clear, these complex patterns of causation are less conducive to hypothesis testing than the more typical assumptions of a one-way channel of influence, such as from experts or other ideational entrepreneurs to policy actors. We will only be able to avoid tautology by mapping out the underlying structures of influence between expert communities and policymakers. Yet making such maps will also reveal important causal relationships that would otherwise remain invisible.

### References

- ABBOTT, ANDREW. 1988. *The System of Professions: An Essay on the Division of Expert Labor*. Chicago: University of Chicago Press.
- . 2005. "Linked Ecologies: States and Universities as Environments for Professions." *Sociological Theory* 23(3): 245–74.
- ALESINA, ALBERTO. 2010. "Fiscal Adjustments: Lessons from Recent History." Prepared for the Ecofin Meeting in Madrid, April 15, Accessed February 16, 2017. <http://scholar.harvard.edu/alesina/publications/fiscal-adjustments-lessons-recent-history>.
- ALESINA, ALBERTO F., AND SILVIA ARDAGNA. 2009. "Large Changes in Fiscal Policy: Taxes versus Spending." NBER Working Paper, Accessed February 16, 2017. <http://www.nber.org/papers/w15438>.
- ANDERSEN, CAMILA. 2009. "IMF Spells Out Need for Global Fiscal Stimulus." International Monetary Fund. Accessed January 12, 2017. <https://www.imf.org/en/News/Articles/2015/09/28/04/53/soint122908a?>
- AVANT, DEBORAH. 2016. "Pragmatic Networks and Transnational Governance of Private Military and Security Services." *International Studies Quarterly* 60(2):330–42.
- AVANT, DEBORAH, MARTHA FINNEMORE, AND SUSAN K. SELL, eds. 2010. *Who Governs the Globe?* New York: Cambridge University Press.
- BABB, SARAH. 2013. "The Washington Consensus as Transnational Policy Paradigm: Its Origins, Trajectory and Likely Successor." *Review of International Political Economy* 20(2): 268–97.
- BAN, CORNEL. 2015a. "Austerity versus Stimulus? Understanding Fiscal Policy Change at the International Monetary Fund since the Great Recession." *Governance* 28(2): 167–83.
- . 2016. *Ruling Ideas: How Global Neoliberalism Goes Local*. New York: Oxford University Press.
- BAN, CORNEL, AND MARK BLYTH. 2013. "The BRICs and the Washington Consensus: An Introduction." *Review of International Political Economy* 20(2): 241–55.
- BARBER, TONY. 2010. "Saving the Euro: Dinner on the Edge of the Abyss." *Financial Times*, April 22. Accessed January 12, 2017. <https://www.ft.com/content/190b32ae-d49a-11df-b230-00144feabd0>.
- BARNETT, MICHAEL N., AND MARTHA FINNEMORE. 2004. *Rules for the World: International Organizations in Global Politics*. Ithaca, NY: Cornell University Press.
- BARRO, ROBERT J., AND CHARLES REDLICK. 2009. "Stimulus Spending Doesn't Work." *Wall Street Journal*, October 1. Accessed January 12, 2017. <http://www.wsj.com/articles/SB10001424052748704471504574440723298786310>.
- BBC. 2008. "German Ridicule for UK Policies." *BBC News*, December 10. Accessed January 12, 2017. <http://news.bbc.co.uk/2/hi/business/7776462.stm>.
- BERMAN, ELIZABETH POPP. 2016. "Trojan Horses in Linked Fields: Economists and Lawyers in US Antitrust Policy, 1965–1981." Unpublished paper.
- BERMAN, ELIZABETH POPP, AND LAURA M. MILANES-REYES. 2013. "The Politicization of Knowledge Claims: The 'Laffer Curve' in the US Congress." *Qualitative Sociology* 36(1): 53–79.
- BERMAN, ELIZABETH POPP, AND NICHOLAS PAGNUCCO. 2010. "Economic Ideas and the Political Process: Debating Tax Cuts in the US House of Representatives, 1962–1981." *Politics & Society* 38(3): 347–72.
- BERMAN, SHERI. 1998. *The Social Democratic Moment: Ideas and Politics in the Making of Interwar Europe*. New York: Cambridge University Press.
- BERNANKE, BEN S. 2015. *The Courage to Act: A Memoir of a Crisis and Its Aftermath*. New York: W. W. Norton.
- BEST, JACQUELINE. 2004. "Hollowing Out Keynesian Norms: How the Search for a Technical Fix Undermined the Bretton Woods Regime." *Review of International Studies* 30(3): 383–404.
- . 2014. *Governing Failure: Provisional Expertise and the Transformation of Global Development Finance*. Cambridge: Cambridge University Press.
- BLANCHARD, OLIVIER J. 2008. "The State of Macro." NBER Working Paper No. 14259.
- BLANCHARD, OLIVIER, GIOVANNI DELL'ARICCIA, AND MAURO PAULO. 2010. *Rethinking Macroeconomic Policy*. Washington, DC: IMF Research Department.
- BLINDER, ALAN S. 2004. *The Case Against the Case Against Discretionary Fiscal Policy*. Princeton NJ: Princeton University. CEPS Working Paper 100.
- . 2013. *After The Music Stopped: The Financial Crisis, The Response, And The Work Ahead*. New York: Penguin.
- BLINDER, ALAN, AND SNOWDON, BRIAN. 2001. "Keeping the Keynesian Faith." *World Economics* 2(2): 105–40.
- BLYTH, MARK. 2002. *Great Transformations: Economic Ideas and Institutional Change in the Twentieth Century*. New York: Cambridge University Press.
- . 2003. "Structures Do Not Come with an Instruction Sheet: Interests, Ideas, and Progress in Political Science." *Perspectives on Politics* 1(4): 695–706.
- . 2013a. *Austerity: The History of a Dangerous Idea*. New York: Oxford University Press.
- . 2013b. "Paradigms and Paradox: The Politics of Economic Ideas in Two Moments of Crisis." *Governance* 26(2): 197–215.
- BLYTH, MARK, ODDNÝ HELGADÓTTIR, AND WILLIAM KRING. 2016. "Ideas and Historical Institutionalism." In *The Oxford Handbook of Historical Institutionalism*, edited by Orfeo Fioretos, Julia Falletti, and Adam Sheingate, 142–62. New York: Oxford University Press.
- BOB, CLIFFORD. 2010. "Packing Heat: Pro Gun Groups and the Governance of Small Arms." In *Who Governs the Globe*, edited by Deborah Avant, Martha Finnemore, and Susan Sell, 183–201. New York: Cambridge University Press.
- BOCKMAN, JOHANNA, AND GIL EYAL. 2002. "Eastern Europe as a Laboratory for Economic Knowledge: The Transnational Roots of Neoliberalism." *American Journal of Sociology* 108(2): 310–52.
- BUNDESMINISTERIUM DER FINANZEN. 2010. *Borrow Oor Save Our Way Out of the Crisis?* German Ministry of Finance.
- CAMPBELL, JOHN L., AND OVE K. PEDERSEN. 2014. *The National Origins of Policy Ideas: Knowledge Regimes in the United States, France, Germany, and Denmark*. Princeton, NJ: Princeton University Press.
- CARDOSO, ANA RUTE, PAOLO GUIMARAES, AND KLAUS F. ZIMMERMANN. 2010. "Trends in Economic Research: An International Perspective." *Kyklos* 63(4): 479–94.
- CARPENTER, R. CHARLI. 2007. "Setting the Advocacy Agenda: Theorizing Issue Emergence and Nonemergence in Transnational Advocacy Networks." *International Studies Quarterly* 51(1): 99–120.
- CHWIEROTH, JEFFREY M. 2009. *Capital Ideas: The IMF and the Rise of Financial Liberalization*. Princeton, NJ: Princeton University Press.
- . 2015. "Professional Ties That Bind: How Normative Orientations Shape IMF Conditionality." *Review of International Political Economy* 2(4): 757–87.
- COLANDER, DAVID. 2007. *The Making of an Economist Redux*. Princeton, NJ: Princeton University Press.
- COMMISSION OF THE EUROPEAN UNION. 2008. *A European Economic Recovery Plan: Com(2008) 800 Final*. Brussels: European Union.
- . 2010. "European Economic Forecast: Autumn 2010." Brussels: European Union.
- COUNCIL OF ECONOMIC ADVISERS. 2010. *The Economic Impact of the American Recovery and Reinvestment Act: Second Quarterly Report, January 13, 2010*. Washington, DC: Executive Office of the President.
- COUNCIL OF ECONOMIC EXPERTS. 2008. *Mastering the Financial Crisis: Strengthening Forces for Growth*. Wiesbaden: Sachverständigenrat.
- . 2009. *Securing the Future Through Responsible Economic Policies*. Wiesbaden: Sachverständigenrat.
- CRANE, DIANA. 1972. *Invisible Colleges: Diffusion of Knowledge in Scientific Communities*. Chicago: University of Chicago Press.

- CROSS, MAI A. K. DAVIS. 2013. "Rethinking Epistemic Communities Twenty Years Later." *Review of International Studies* 39(1): 137–60.
- DE LONG, J. BRADFORD. 2010. "Keynes & Co Have Lost the Stimulus Argument." *The Week*, July 6. Accessed January 12, 2017. <http://the-week.com/articles/493005/keynes-have-lost-stimulus-argument>.
- DJELIC, MARIE-LAURE, AND SIGRID QUACK. 2010. *Transnational Communities: Shaping Global Economic Governance*. New York: Cambridge University Press.
- DONNAN, SHAWN. 2016. "IMF Calls on G20 to Take 'Bold' Action." *Financial Times*, February 24. Accessed January 12, 2017. <https://www.ft.com/content/0605d444-db19-11e5-9ba8-3abc1e7247e4>.
- DREZNER, DANIEL W. 2007. *All Politics Is Global: Explaining International Regulatory Regimes*. Princeton, NJ: Princeton University Press.
- . 2014. *The System Worked: How the World Stopped Another Great Depression*. New York: Oxford University Press.
- DREZNER, DANIEL W., AND KATHLEEN R. MCNAMARA. 2013. "International Political Economy, Global Financial Orders and the 2008 Financial Crisis." *Perspectives on Politics* 11(1): 155–66.
- DULLEN, SEBASTIAN. 2008. "Eurozone Watch—German Economists Have to Take Some Blame for Merkel's Slow Reaction." *Eurozone Watch*, December 4. Accessed January 12, 2017. <http://www.economonitor.com/blog/2008/12/german-economists-have-to-take-some-blame-for-merkels-slow-reaction/>.
- EICHENGREEN, BARRY. 2008. "In Desperate Economic Times, Grasp the Fiscal Nettle—Comment Is Free." *The Guardian*, October 9. Accessed January 12, 2017. <https://www.theguardian.com/commentisfree/2008/oct/09/creditrunch.economy>.
- . 2016. "Why the World Economy Needs Fiscal Policy to Overcome Stagnation." *Social Europe*, March 18. Accessed January 12, 2017. <https://www.socialeurope.eu/2016/03/why-the-world-economy-needs-fiscal-policy-to-overcome-stagnation/>.
- ELKINS, ZACHARY, ANDREW T. GUZMAN, AND BETH A. SIMMONS. 2006. "Competing for Capital: The Diffusion of Bilateral Investment Treaties, 1960–2000." *International Organization* 60(4): 811–46.
- EVANS, PETER, AND MARTHA FINNEMORE. 2001. *Organizational Reform and the Expansion of the South's Voice at the Fund*. UNCTAD Discussion Paper 24, Cambridge MA: Harvard University Center for International Development.
- FARRELL, HENRY, AND MARTHA FINNEMORE. 2016. "Global Institutions Without a Global State." In *Oxford Handbook of Historical Institutionalism*, edited by Orfeo Fioretos, Tullia G. Falletti and Adam Sheingate, 572–89. New York: Oxford University Press.
- FAULCONBRIDGE, JAMES, AND DANIEL MUZIO. 2008. "Organizational Professionalism in Globalizing Law Firms." *Work, Employment & Society* 22(1): 7–25.
- FELDBSTEIN, MARTIN. 1981. "The Retreat of Keynesian Economics." *Public Interest* 64: 92–105.
- FINNEMORE, MARTHA, AND KATHRYN SIKKINK. 1998. "International Norm Dynamics and Political Change." *International Organization* 52(4): 887–917.
- FOURCADE, MARION. 2006. "The Construction of a Global Profession: The Transnationalization of Economics." *American Journal of Sociology* 112(1): 145–94.
- . 2009. *Economists and Societies: Discipline and Profession in the United States, Britain, and France, 1890s to 1990s*. Princeton, NJ: Princeton University Press.
- FOURCADE, MARION, ETIENNE OLLION, AND YANN ALGAN. 2015. "The Superiority of Economists." *Journal of Economic Perspectives* 29(1): 89–113.
- FRANKFURTER RUNDSCHAU. 2008. "Peter Struck Zu Sachverständigenrat: Inkompetent und Überflüssig." *Frankfurter Rundschau*, November 15. Accessed January 12, 2017. <http://www.fr-online.de/politik/peter-struck-zu-sachverstaendigenrat-inkompetent-und-ueberflues-sig-,1472596,3380746.html>.
- GEITHNER, TIMOTHY. 2014. *Stress Test: Reflections on Financial Crises*. New York: Random House.
- GILES, CHRIS, AND GILLIAN TETT. 2008. "IMF Head in Shock Fiscal Warning." *Financial Times*, January 28. Accessed January 12, 2017. <http://www.ft.com/cms/s/0/ea8221ee-cd40-11dc-9b2b-000077b07658.html>.
- GONZALES-PARAMO, JOSE MANUEL. 2010. "Monetary and Fiscal Policy Interactions During the Financial Crisis." Speech given in Madrid, February 26. Frankfurt: European Central Bank.
- GOYAL, SANJEEV, MARCO J. VAN DER LEIJ, AND JOSÉ LUIS MORAGA-GONZÁLEZ. 2006. "Economics: An Emerging Small World." *Journal of Political Economy* 114(2): 403–32.
- HAAS, PETER M. 1992. "Introduction: Epistemic Communities and International Policy Coordination." *International Organization* 46(1): 1–35.
- HALL, PETER A. 1989. *The Political Power of Economic Ideas: Keynesianism Across Nations*. Princeton, NJ: Princeton University Press.
- HAN, SHIN-KAP. 2003. "Tribal Regimes in Academia: A Comparative Analysis of Market Structure Across Disciplines." *Social Networks* 25(3): 251–80.
- HARRINGTON, BROOKE. 2012. "Trust and Estate Planning: The Emergence of a Profession and Its Contribution to Socioeconomic Inequality." *Sociological Forum* 27(4): 825–46.
- HEIPERTZ, MARTIN, AND AMY VERDUN. 2010. *Ruling Europe: The Politics of the Stability and Growth Pact*. New York: Cambridge University Press.
- HELGADÓTTIR, ODDNÝ. 2016. "The Bocconi Boys Go to Brussels: Italian Economic Ideas, Professional Networks and European Austerity." *Journal of European Public Policy* 23(3): 392–409.
- HENNESSY, PATRICK. 2008. "Alistair Darling Turns to Keynes as He Looks to Spend His Way Out of Recession." *The Daily Telegraph*, October 18. Accessed December 13, 2016. <http://www.telegraph.co.uk/finance/economics/3223224/Alistair-Darling-turns-to-Keynes-as-he-looks-to-spend-his-way-out-of-recession.html>.
- HIRSCHMAN, DANIEL, AND ELIZABETH POPP. BERMAN. 2014. "Do Economists Make Policies? On the Political Effects of Economics." *Socio-Economic Review* 12(4): 779–811.
- ISLAM, IYANATUL, AND ANIS CHOWDHURY. 2012. "Revisiting the Evidence on Expansionary Fiscal Austerity: Alesina's Hour." VoxEU.org, February 28. Accessed January 12, 2017. <http://voxeu.org/debates/commentaries/revisiting-evidence-expansionary-fiscal-austerity-alesina-s-hour>.
- JIANG, YANG. 2011. "Rethinking the Beijing Consensus: How China Responds to Crises." *Pacific Review* 24(3): 337–56.
- JONES, ERIK. 2007. "European Macroeconomic Governance." In *European Union: Power and Policy-Making*, edited by Jeremy Richardson and Sonia Mazey, 283–316. London: Routledge.
- KECK, MARGARET E., AND KATHRYN SIKKINK. 1998. *Activists Beyond Borders: Advocacy Networks in International Politics*. Ithaca, NY: Cornell University Press.
- KEYNES, JOHN MAYNARD. 1937. "The Boom, Not the Slump, Is the Right Time for Austerity at the Treasury." *The Times*, January 14, 1937. Accessed February 17, 2017. <http://cas2.umkc.edu/economics/people/facultyPages/wray/courses/Econ601%202012/readings/Keynes%20World%20Crises.pdf>.
- KRASNER, STEPHEN D. 1991. "Global Communications and National Power: Life on the Pareto Frontier." *World Politics* 43(3): 336–66.
- KREBS, RONALD R., AND PATRICK THADDEUS JACKSON. 2007. "Twisting Tongues and Twisting Arms: The Power of Political Rhetoric." *European Journal of International Relations* 13(1): 35–66.
- KRUGMAN, PAUL. 2009. "How Did Economists Get It So Wrong?" *New York Times*, September 2. Accessed December 13, 2016. <http://www.nytimes.com/2009/09/06/magazine/06Economic-t.html>.
- LINDVALL, JOHANNES. 2009. "The Real But Limited Influence of Expert Ideas." *World Politics* 61(4): 703–30.
- LIZZA, RYAN. 2009. "Inside the Crisis: Larty Summers and the White House Economics Team." *The New Yorker*. Accessed January 12, 2017. <http://www.newyorker.com/magazine/2009/10/12/inside-the-crisis>.
- MANDELKERN, RONEN, AND MICHAEL SHALEV. 2010. "Power and the Ascendance of New Economic Policy Ideas: Lessons from the 1980s Crisis in Israel." *World Politics* 62(3): 459–95.
- MANKIW, N. GREGORY. 2006. "The Macroeconomist as Scientist and Engineer." *Journal of Economic Perspectives* 20(4): 29–46.
- MATTHIJS, MATTHIAS. 2016. "Powerful Rules Governing the Euro: The Perverse Logic of German Ideas." *Journal of European Public Policy* 23(3): 375–91.
- MCNAMARA, KATHLEEN R. 1998. *The Currency of Ideas: Monetary Politics in the European Union*. New York: Cambridge University Press.
- MERKEL, ANGELA. 2008. "Speech to the CDU Annual Conference." Accessed February 17, 2017. <http://www.bernhard-kaster.de/upload/dokumente/10188.pdf>.



- NELSON, STEPHEN C. 2014. "Playing Favorites: How Shared Beliefs Shape the IMF's Lending Decisions." *International Organization* 68(2): 297–328.
- NEWMAN, ABRAHAM L. 2010. "Flight from Risk: Unified Germany and the Role of Beliefs in the European Response to the Financial Crisis." *German Politics and Society* 28(2): 151–64.
- ÖNDER, ALI SINA, AND MARKO TERVIÖ. 2014. "Is Economics a House Divided? Analysis of Citation Networks." *Economic Inquiry* 53(3): 1491–505.
- ORESQUES, NAOMI. 2004. "The Scientific Consensus on Climate Change." *Science* 306(5702): 1686.
- O'ROURKE, KEVIN. 2010. "What Do Markets Want?" *EuroIntelligence*, June 3. Accessed January 12, 2017. <http://www.eurointelligence.com/news-details/article/what-do-markets-want.html?>
- PAULSON, HENRY M. 2010. *On the Brink: Inside the Race to Stop the Collapse of the Global Financial System*. New York: Business Plus.
- QUIGGIN, JOHN. 2010. *Zombie Economics*. Princeton, NJ: Princeton University Press.
- RODRIG, DANI. 2010. "The Market Confidence Bugaboo." *Project Syndicate*, July 12. Accessed January 12, 2017. <https://www.project-syndicate.org/commentary/the-market-confidence-bugaboo>.
- ROGOFF, KENNETH, AND CARMEN REINHART. 2010. "Growth in a Time of Debt." *American Economic Review* 100(2): 573–78.
- ROMER, CHRISTINA. 2009. "The Case for Fiscal Stimulus: The Likely Effects of the American Recovery and Reinvestment Act." Remarks presented at the University of Chicago, February 27, Accessed February 17, 2017. <http://web.archive.org/web/20090312104109/http://www.whitehouse.gov/administration/eop/cea/chairs-remarks/02272009/>.
- RUGGIE, JOHN GERARD. 1982. "International Regimes, Transactions, and Change: Embedded Liberalism in the Postwar Economic Order." *International Organization* 36(2): 379–415.
- SAUNDERS, ELIZABETH. Forthcoming. "No Substitute for Experience: Presidents, Advisers, and Information in Group Decision-Making." *International Organization*.
- SCHÄUBLE, WOLFGANG. 2010. "Maligned Germany Is Right to Cut Spending." *Financial Times*, June 23. Accessed January 12, 2017. <https://www.ft.com/content/216daeba-7f0c-11df-84a3-00144feabd0>.
- . 2012. "Q&A: German Finance Minister Takes on Critics." *Wall Street Journal*, January 29. Accessed January 13, 2017. <http://www.wsj.com/articles/SB10001424052970204740904577191172968486322>.
- SCHIEBER, NOAM. 2012. *The Escape Artists: How Obama's Team Fumbled the Recovery*. New York: Simon and Schuster.
- SCHLESINGER, JACOB. 1999. "Why Is Keynesianism Apparently Fading with So Much of the World in Recession?" *Wall Street Journal*, February 2. Accessed January 12, 2017. <http://www.wsj.com/articles/SB917908248144134500>.
- SCHULTZE, CHARLES L. 1996. "The CEA: An Inside Voice for Mainstream Economics." *Journal of Economic Perspectives* 10(3): 23–39.
- SEABROOKE, LEONARD. 2014. "Epistemic Arbitrage: Transnational Professional Knowledge in Action." *Journal of Professions and Organization* 1(1): 49–64.
- SEABROOKE, LEONARD, AND ELENI TSINGOU. 2014. "Distinctions, Affiliations, and Professional Knowledge in Financial Reform Expert Groups." *Journal of European Public Policy* 21(3): 389–407.
- SEABROOKE, LEONARD, AND DUNCAN WIGAN. 2016. "Powering Ideas Through Expertise: Professionals in Global Tax Battles." *Journal of European Public Policy* 23(3): 357–74.
- SIMMONS, BETH A. 2001. "The International Politics of Harmonization: The Case of Capital Market Regulation." *International Organization* 55(3): 589–620.
- SKIDELSKY, R. 2009. *Keynes: The Return of the Master*. New York: Public Affairs.
- SPIEGEL, PETER. 2015. "Klaus Regling Interview: The Annotated Transcript." *Financial Times*, October 2. Accessed January 12, 2017. <https://www.ft.com/content/f5de7464-8d83-3ee8-83bc-8a749c9f479a>.
- SUSKIND, RON. 2011. *Confidence Men: Wall Street, Washington, and the Education of a President*. New York: HarperCollins.
- TALLEY, IAN. 2016. "The IMF Is Sounding the Alarm. Is Anyone Listening?" *Wall Street Journal*, March 8. Accessed January 12, 2017. <http://blogs.wsj.com/economics/2016/03/08/the-imf-is-sounding-the-alarm-is-anyone-listening/>.
- TAYLOR, JOHN B. 2011. "An Empirical Analysis of the Revival of Fiscal Activism in the 2000s." *Journal of Economic Literature* 49(3): 686–702.
- THEIL, STEFAN. 2008. "Peer Steinbrück on the Global Economic Crisis." *Newsweek*, December 5. Accessed January 12, 2017. <http://www.newsweek.com/peer-steinbruck-global-economic-crisis-83363>.
- TRICHET, JEAN-CLAUDE. 2009. *Macroeconomic Policies, Imbalances and the Need to Avoid Going Back to the Status Quo Ante*. Frankfurt: European Central Bank.
- . 2010. "Stimulate No More—It Is Now Time for All to Tighten." *Financial Times*, July 22. Accessed January 12, 2017. <https://www.ft.com/content/1b3ae97e-95c6-11df-b5ad-00144feab49a>.
- UCHIELLE, LOUIS. 2009. "Economists Warm to Government Spending But Debate Its Form." *New York Times*, January 6. Accessed January 12, 2017. <http://www.nytimes.com/2009/01/07/business/economy/07spend.html>.
- URFALINO, PHILIPPE. 2007. "La Décision Par Consensus Apparent. Nature Et Propriétés." *Revue Européenne des Sciences Sociales* 45(136): 47–70.
- VAIL, MARK I. 2014. "Varieties of Liberalism: Keynesian Responses to the Great Recession in France and Germany." *Governance* 27(1): 63–85.
- VAN GUNTEN, TOD S. 2015. "Cycles of Polarization and Settlement: Diffusion and Transformation in the Macroeconomic Policy Field." *Theory and Society* 44(4): 321–54.
- VON NEUBACHER, ALEXANDER, AND MICHAEL SAUGA. 2009. "Sind Alle Verrückt Geworden?" *Der Spiegel*, January 26. Accessed January 12, 2017. <http://www.spiegel.de/spiegel/print/d-63806924.html>.
- WALKER, MARCUS. 2008. "German Talks Address Long-Term Stimulus". *The Wall Street Journal*, 15 December, 2008. p.A12.
- WALLICH, HENRY C. 1968. "The American Council of Economic Advisers and the German Sachverstaendigenrat: A Study in the Economics of Advice." *Quarterly Journal of Economics* 82(3): 349–79.
- WEIR, MARGARET. 1989. "Ideas and Politics: The Acceptance of Keynesianism in Britain and the United States." In *The Political Power of Economic Ideas: Keynesianism Across Nations*, edited by Peter Hall, 53–86. Princeton, NJ: Princeton University Press.
- WOLF, MARTIN. 2014. *The Shifts and the Shocks: What We've Learned—and Have Still to Learn—From the Financial Crisis*. New York: Penguin.
- WOODS, NGAIRE. 1995. "Economic Ideas and International Relations: Beyond Rational Neglect." *International Studies Quarterly* 39(2): 161–80.
